# Supplementary material for: Unraveling networks of co-regulated genes on the sole basis of genome sequences
Source: PubMed Central journal article supplement — Nucleic Acids Res. 2011 May 13;39(15):6340–58. doi: 10.1093/nar/gkr264 (PMC3159452; doi:10.1093/nar/gkr264), 2011-05-13
Supplement: supp_gkr264_Figure_S2_metrics_validation.pdf [file supp_gkr264_Figure_S2_metrics_validation.pdf]

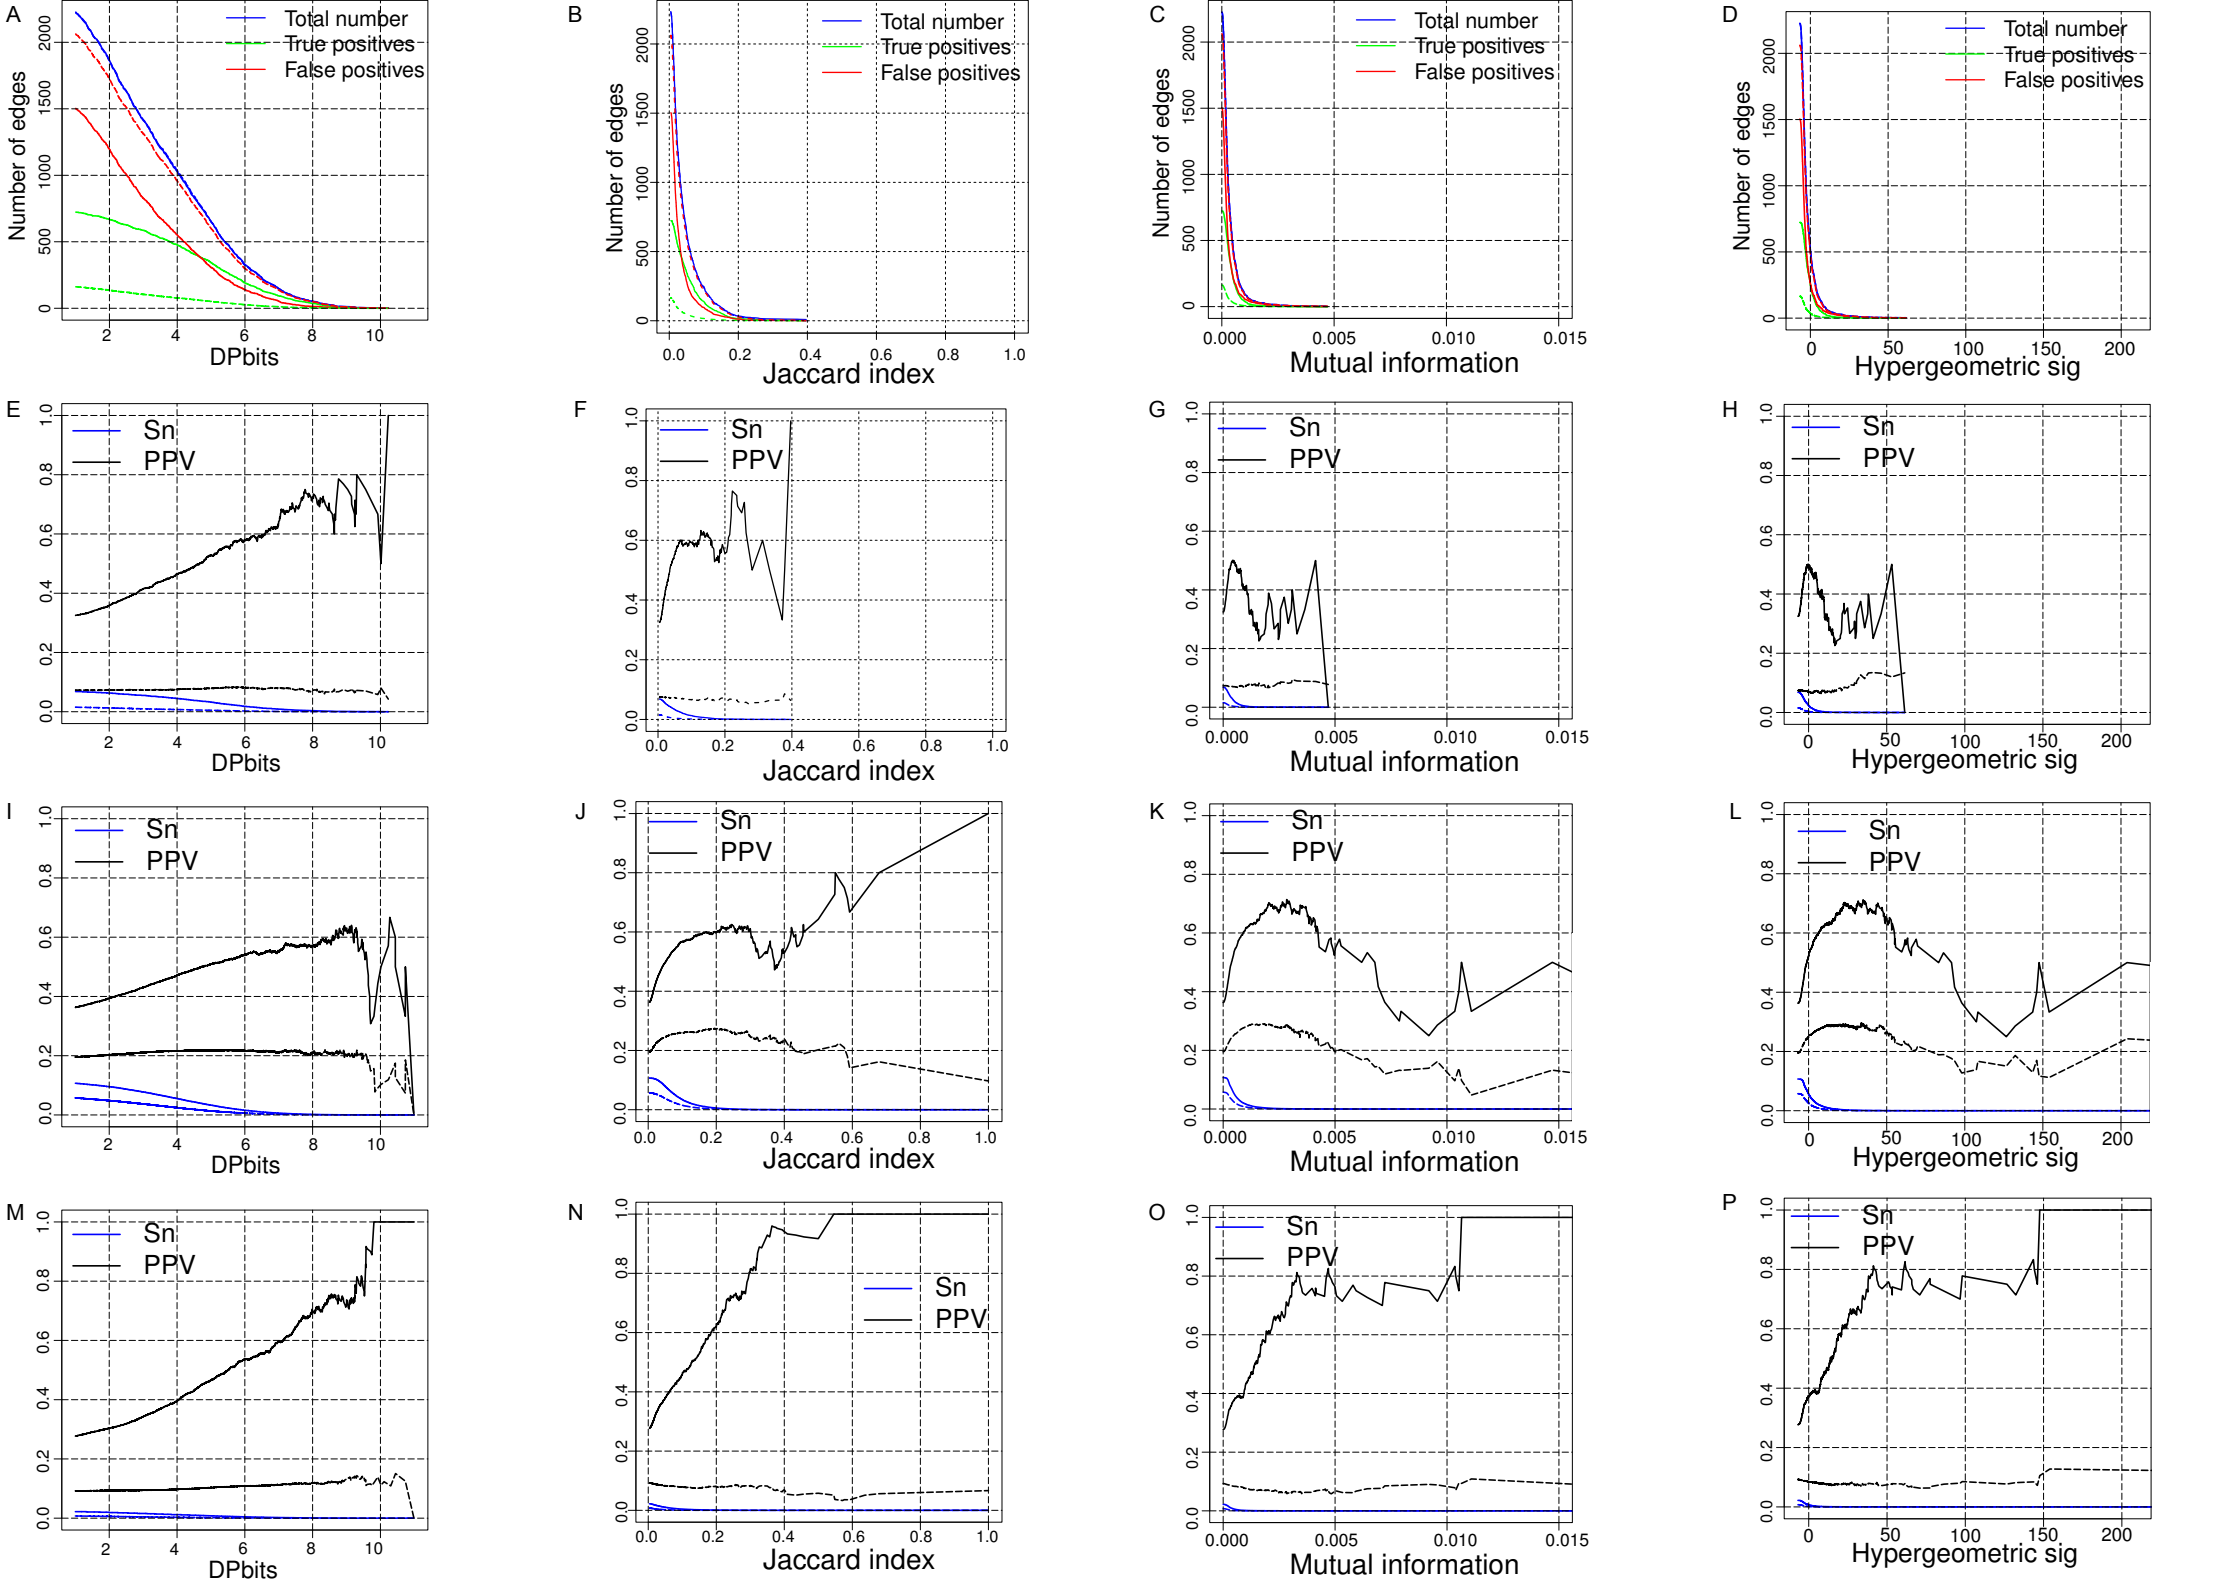

**Supplementary Figure S2. Quantitative evaluation of the impact of different scores on the inferred co-regulation network.** Each column shows the results when using one score: DPbits (1st column: A,E,I,M), Jaccard Similarity (2nd column: B,F,J,N), Mutual Information (3rd column: C,G,K,O), Hypergeometric Significance (4th column: d,h,l,p). The first row shows the number of inferred co-regulation interactions as a function of the score (A-D). Color code : Blue : total number of edges. Green : true positive. Red : false positives. Dotted lines : random control. The second row shows the results of the evaluation of the inferred versus annotated co-regulation networks (E-H). The third row shows the results of the comparison of the inferred co-regulation versus co-expression (STRING) (I-L). The last row shows the results of the comparison of the inferred co-regulation network versus co-binding network (Harbison et al, 2004). Color code : Black : PPV. Blue : Sensitivity. Dotted lines : random control.
