# Supplementary material for: Unraveling networks of co-regulated genes on the sole basis of genome sequences
Source: PubMed Central journal article supplement — Nucleic Acids Res. 2011 May 13;39(15):6340–58. doi: 10.1093/nar/gkr264 (PMC3159452; doi:10.1093/nar/gkr264), 2011-05-13
Supplement: supp_gkr264_figure_S3_metrics_comparison.pdf [file supp_gkr264_figure_S3_metrics_comparison.pdf]

A

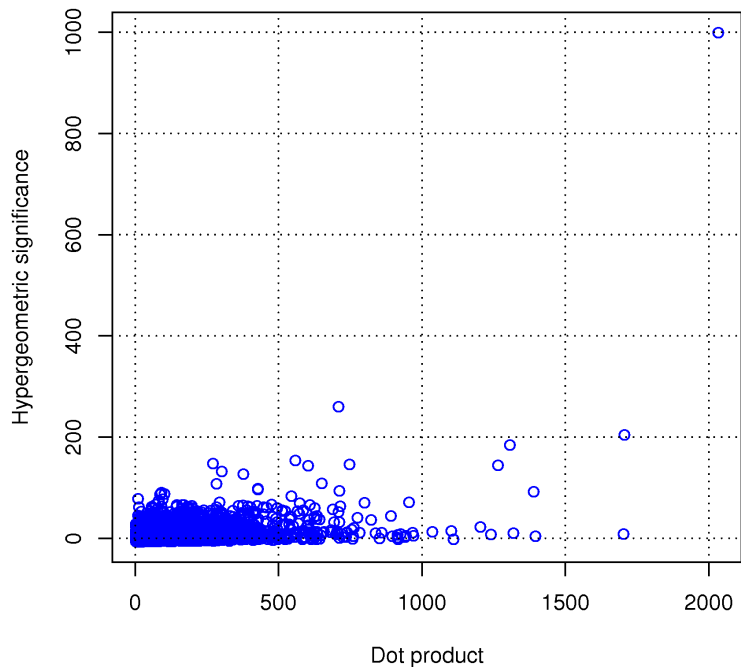

B

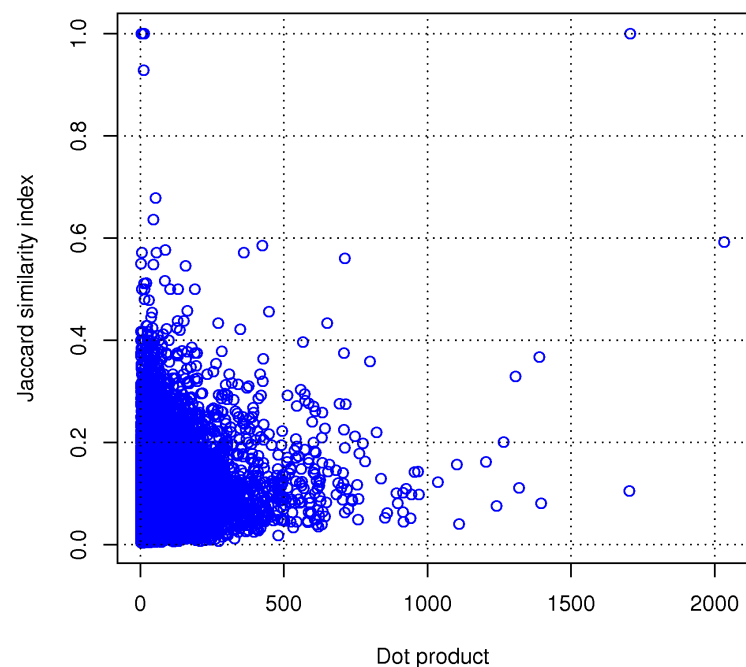

C

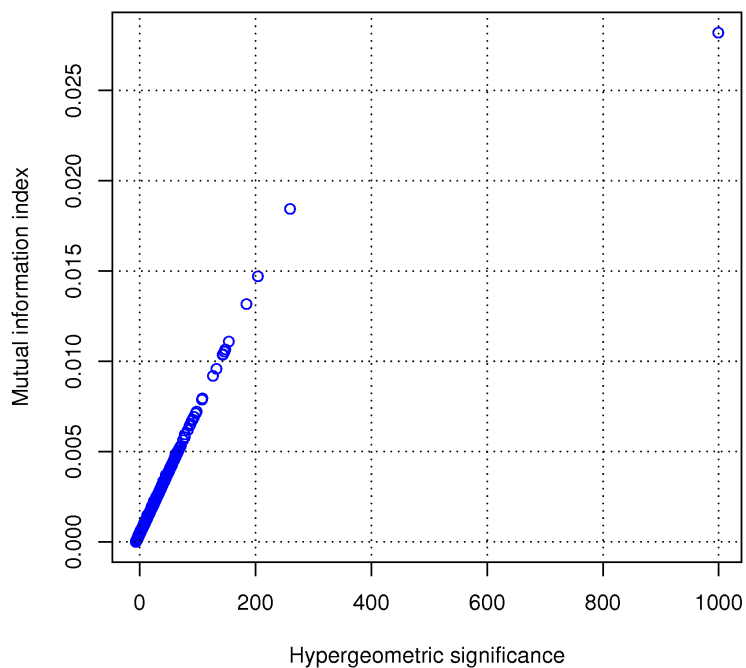

D

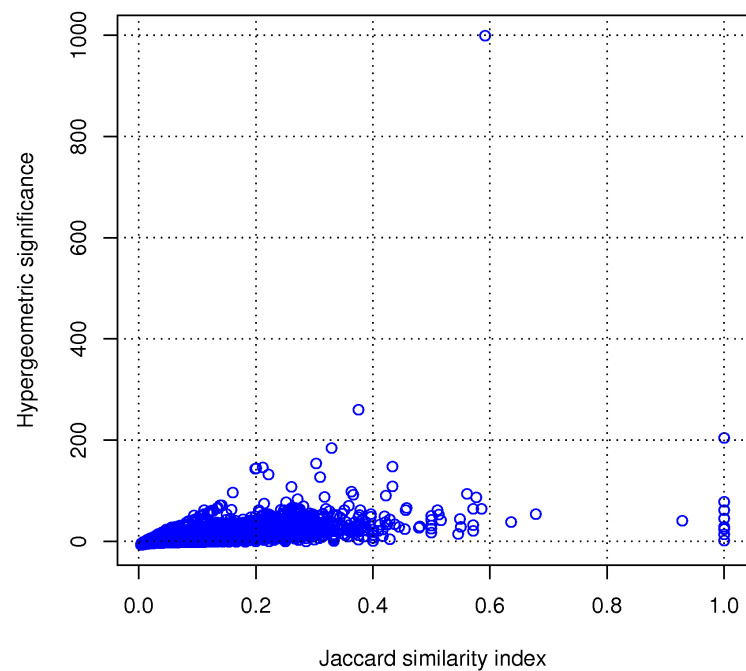

**Supplementary Figure S3.** Comparisons between alternative metrics for computing the similarity between dyad significance profiles. Note the almost perfect correspondence between hypergeometric significance and mutual information, and the strong differences between all the other pairs of metrics.
