# Supplementary material for: Unraveling networks of co-regulated genes on the sole basis of genome sequences
Source: PubMed Central journal article supplement — Nucleic Acids Res. 2011 May 13;39(15):6340–58. doi: 10.1093/nar/gkr264 (PMC3159452; doi:10.1093/nar/gkr264), 2011-05-13
Supplement: supp_gkr264_figure_S4_venn.pdf [file supp_gkr264_figure_S4_venn.pdf]

STRING

co-expression network

annotated regulons

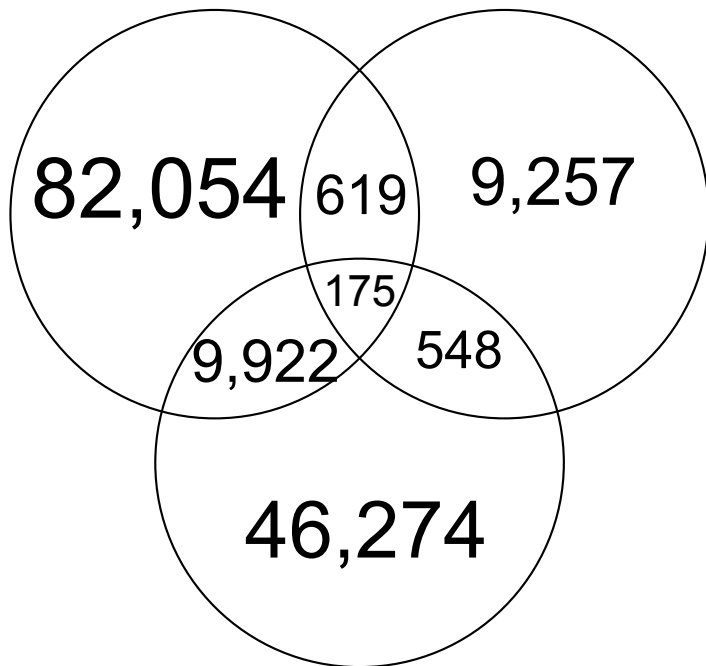

predicted co-regulation network

**Supplementary Figure S4.** Venn diagram indicating the intersections between annotated regulons, STRING co-expression and predicted co-regulation networks, respectively.
